# Supplementary material for: Development and Validation of an Interdisciplinary Worker’s Health Approach Instrument (IWHAI)
Source: MDPI journal article supplement (doi:10.3390/ijerph16152803), 2019-08-06
Supplement: s1 [file s1]

## Interdisciplinary Worker's Health Approach Instrument - IWHA1

| DIMENSION                 | INDICATOR                                          | SCALE                                                    |                                                                    |                                              |                                                        | CRITICITY   |              |
|---------------------------|----------------------------------------------------|----------------------------------------------------------|--------------------------------------------------------------------|----------------------------------------------|--------------------------------------------------------|-------------|--------------|
|                           |                                                    | Sub-Index 0                                              | Sub-Index 1                                                        | Sub-Index 2                                  | Sub-Index 3                                            |             | Sub-Index 4  |
| <b>Physical Education</b> | Physical activity level                            | Sedentary                                                | Irregularly Active B                                               | Irregularly Active BA                        | Regularly Active                                       | Very Active | Non-critical |
|                           | Contemplation stage for physical activity practice | Pre-Contemplative                                        | Contemplative                                                      | Preparation                                  | Action                                                 | Maintenance | Critical     |
|                           | Feeling of pain                                    | Intolerable                                              | Severe                                                             | Moderate                                     | Low                                                    | Absent      | Critical     |
|                           | Cardiorespiratory fitness                          | Very Weak                                                | Weak                                                               | Regular                                      | Good                                                   | Excellent   | Non-critical |
|                           | Abdominal strength level                           | Weak                                                     | Regular                                                            | Medium                                       | Good                                                   | Excellent   | Non-critical |
|                           | Flexibility level                                  | Weak                                                     | Regular                                                            | Medium                                       | Good                                                   | Excellent   | Non-critical |
|                           | Manual gripping force                              | Weak                                                     | Regular                                                            | Medium                                       | Good                                                   | Excellent   | Non-critical |
| <b>Nursing</b>            | Exposure to environmental risks (physical,         | Exposure unknown or higher than limit tolerance, without | Exposure superior to limit tolerance, with protection (EPI/EPC) or | Exposure above NA, with protection (EPI/EPC) | Exposure to irrelevant levels, with or without EPI/EPC | No Exposure | Critical     |

|                                        |                                                                                                                                            |                                                                                                                                          |                                                                                                                              |                                                                                                                                          |                                                                                                                                    |                                                                                                                                                |              |
|----------------------------------------|--------------------------------------------------------------------------------------------------------------------------------------------|------------------------------------------------------------------------------------------------------------------------------------------|------------------------------------------------------------------------------------------------------------------------------|------------------------------------------------------------------------------------------------------------------------------------------|------------------------------------------------------------------------------------------------------------------------------------|------------------------------------------------------------------------------------------------------------------------------------------------|--------------|
| chemical and biological                | individual protection equipment /collective protection equipment (EPI/EPC) protection                                                      | above unprotected action level (NA)                                                                                                      |                                                                                                                              |                                                                                                                                          |                                                                                                                                    |                                                                                                                                                |              |
| Ergonomic risks—physical aspects       | Work place/Work area not assessed by the ergonomics team and not adapted                                                                   | Work place/Work area not assessed by ergonomics team. Adaptations made by the worker                                                     | Work place/Work area assessed by the ergonomics team. Adaptations made by the worker                                         | Work place/Work area assessed and adapted by the ergonomics team                                                                         | Work place/Work area assessed, adapted by the ergonomics team, in addition to proper posture, the worker refers comfort and safety | Organizational factors under favourable conditions. Positive worker interaction with policies and processes contributing to health maintenance | Critical     |
| Ergonomic risks—organizational aspects | Organizational factors in intolerable condition. Worker interaction with policies and processes that imply negative interference in health | Organizational factors in tolerable condition. Worker interaction with policies and processes that imply negative interference in health | Organizational factors in tolerable condition. Worker interaction with policies and processes without interference in health | Organizational factors under favourable conditions. Interaction of the worker with policies and processes without interference in health | Positive worker interaction with policies and processes contributing to health maintenance                                         | Same previous condition;                                                                                                                       | Non-critical |
| Work environment health conditions     | Weak sanitary aspects (Physical structure, hygienic-sanitary conditions, organization of the environment)                                  | Bad sanitary aspects (Physical structure, hygienic-sanitary conditions, organization of the environment)                                 | Good sanitary Aspects (Physical structure, hygienic-sanitary conditions, organization of the environment)                    | Optimum sanitary Aspects (Physical structure, hygienic-sanitary conditions, organization of the environment)                             | Maintenance and Implementation Plan of 5S Organization Tool                                                                        |                                                                                                                                                | Critical     |

|                        |                                                                                                                          |                                                                                                                                                                                                                                                                               |                                                                                                                                                                                                    |                                                                                                                                                                                                                                                                |                                                                                           |              |
|------------------------|--------------------------------------------------------------------------------------------------------------------------|-------------------------------------------------------------------------------------------------------------------------------------------------------------------------------------------------------------------------------------------------------------------------------|----------------------------------------------------------------------------------------------------------------------------------------------------------------------------------------------------|----------------------------------------------------------------------------------------------------------------------------------------------------------------------------------------------------------------------------------------------------------------|-------------------------------------------------------------------------------------------|--------------|
| Pests and vectors      | Infestation of pests and/or urban vectors with health damage                                                             | Infestation of pests and/or urban vectors without harm to health                                                                                                                                                                                                              | Presence of pests or urban vectors with partial monitoring                                                                                                                                         | Monitoring the synanthropic fauna of working environments without damage to health                                                                                                                                                                             | Same previous condition, with monitoring of the annual environmental profile              | Non-critical |
| Air quality            | Does not carry out cleaning and maintenance actions of the air conditioning system and/or there is no schedule           | Performs cleaning and maintenance of the air conditioning system, but does not have standard operational procedure (POP) and Maintenance, Operation and Control Plan (PMOC), or does not follow the POP or PMOC or schedule, or these are not made available to the executors | Performs cleaning and maintenance actions of the air conditioning system, it has POP, but does not meet all legal requirements and/or PMOC performed by demand or does not make records available. | Performs cleaning and maintenance actions of the air conditioning system, according to the schedule, POP and PMOC, which comply with the legislation and are made available, as well as the records of the execution of the procedures established in the PMOC | Same previous condition, with evidence of periodic trainings of the executors             | Non-critical |
| Drinking water quality | No reports available or reports with illegible results or values that are not in compliance with current legal standards | Reports do not present all the information as required by law                                                                                                                                                                                                                 | Reports with some illegible information, but do not compromise the results                                                                                                                         | Reports available, legible and with all parameters and values adequate to legal requirements                                                                                                                                                                   | Same previous condition, with reports that have been in compliance for more than 6 months | Non-critical |
| Work accident          | Typical work accident, with permanent leave and injury in the last year                                                  | Typical work accident, with absence and permanent injury in the last year                                                                                                                                                                                                     | Typical work accident, no leave in the last year                                                                                                                                                   | No typical work accident history in the last year                                                                                                                                                                                                              | No history of work-related accidents in the last 5 years                                  | Non-critical |

|                          |                                                                                                                                                        |                                                                                                                                                  |                                                                                                                                                     |                                                                                                                                              |                                                                                                                          |              |
|--------------------------|--------------------------------------------------------------------------------------------------------------------------------------------------------|--------------------------------------------------------------------------------------------------------------------------------------------------|-----------------------------------------------------------------------------------------------------------------------------------------------------|----------------------------------------------------------------------------------------------------------------------------------------------|--------------------------------------------------------------------------------------------------------------------------|--------------|
| Work-related absenteeism | Retirement related to work between 16 and 60 days in the last year                                                                                     | Work-related leave less than 15 days in the last year                                                                                            | No history of work-related absence in the past year                                                                                                 | No history of work-related absence in the past year                                                                                          | No history of work-related absence in the last 5 years                                                                   | Non-critical |
| Family relationships     | Conflicting family environment components that negatively affect health, have been identified                                                          | Mobilizing components of the family environment, which negatively interfere in health, have been identified                                      | Mobilizing components of the family environment, that do not interfere in health, have been identified                                              | Stable family environment components that positively interfere in health, have been identified                                               | Same previous condition, with a network of mutual support, which positively interferes in the health of the whole family | Non-critical |
| Social aspects—leisure   | Does not use leisure or social environments as a way of maintaining/recovering health. Does not identify the influence of these actions for well-being | Does not use leisure or social environments as a way of maintaining/recovering health, identifies the importance of these actions for well-being | Uses leisure and social environments as a way of maintaining/recovering health and does not identify the importance of these actions for well-being | Uses leisure and social environments as a way of maintaining/recovering health and identifies the importance of these actions for well-being | Same previous condition. Describes positive health outcomes                                                              | Non-critical |
| Self-care level          | Pre-contemplation (Does not implement self-care, is not willing to make changes to improve health condition)                                           | Contemplation (Does not implement self-care, recognizes the need to make changes to improve health condition)                                    | Preparation (Decides to implement self-care, ready to make changes to improve health condition, in the near future)                                 | Action (Implements self-care and makes changes even in the initial phase, to improve health condition)                                       | Maintenance (Implements continuously)                                                                                    | Critical     |

---

|                 |                                      |                                                                                                                               |                                                                                   |                                                                                    |                                                                     |                                                                                                 |          |
|-----------------|--------------------------------------|-------------------------------------------------------------------------------------------------------------------------------|-----------------------------------------------------------------------------------|------------------------------------------------------------------------------------|---------------------------------------------------------------------|-------------------------------------------------------------------------------------------------|----------|
| <b>Medicine</b> | Tobacco use                          | Smoker, 25 or more cigarettes/day                                                                                             | Smoker ,15–24 cigarettes/day                                                      | Smoker, 1–14 cigarettes/day                                                        | Ex-smoker                                                           | Ex-smoker for more than 5 years                                                                 | Critical |
|                 | Stress level and symptoms            | Above 7 signs of stress                                                                                                       | 6 signs of stress                                                                 | 5 signs of stress                                                                  | 4 signs of stress                                                   | Less than 3 signs of stress                                                                     | Critical |
|                 | Dyslipidaemia                        | LDL greater than 190                                                                                                          | LDL between 160 and 189                                                           | LDL between 130 and 159                                                            | LDL between 100 and 129                                             | Below 100                                                                                       | Critical |
|                 | Diabetes mellitus (DM)               | Glycated Hb > 9% or Fasting glycemia > 200 mg/dl, maintaining these results in the last 2 years and/or installed complication | Glycated Hb > 9% or Fasting glycemia > 200 mg/dl                                  | Glycated Hb between 7% and 9% or fasting glycemia between 130 and 200 mg/dl        | Glycated Hb < 7% or Fasting Glycemia < 130 mg/dl                    | Glycated Hb < 7% or Fasting Glycemia < 130 mg/dl, maintaining these results in the last 2 years | Critical |
|                 | Systemic Arterial hypertension (SAH) | SAH with associated clinical conditions (cardiovascular disease or chronic kidney disease)                                    | HAS with presence of target organ injury or DM                                    | HAS with 3 or more risk factors                                                    | HAS with 1 to 2 risk factors                                        | HAS without risk factor                                                                         | Critical |
|                 | Musculoskeletal pathology            | Symptomatic pathology involving rehabilitation                                                                                | Symptomatic pathology involving reduction of work ability capacity or restriction | Symptomatic pathology without impact on work ability or symptoms without diagnosis | Asymptomatic pathology with treatment (medication or physiotherapy) | Asymptomatic pathology without treatment                                                        | Critical |
|                 | Psychiatric pathology                | Symptomatic pathology involving rehabilitation                                                                                | Symptomatic pathology involving reduction of work                                 | Symptomatic pathology without impact on work ability                               | Asymptomatic pathology with                                         | Asymptomatic pathology                                                                          | Critical |

|                        |                                                                                            | ability capacity or restriction                              | or symptoms without diagnosis                              | treatment (medication or physiotherapy)               | without treatment                               |          |
|------------------------|--------------------------------------------------------------------------------------------|--------------------------------------------------------------|------------------------------------------------------------|-------------------------------------------------------|-------------------------------------------------|----------|
| Altered glycemia       | Fasting glycemia > 200 mg/dl, maintaining these results in the last 2 years                | Fasting glycemia > 200 mg/dl                                 | Fasting glycemia 126–200 mg/dl                             | Fasting glycemia 100–125 mg/dl                        | Fasting glycemia < 100 mg/dl                    | Critical |
| Altered blood pressure | Fasting glycemia < 100<br>Blood Pressure Stage 3:<br>PAS > 180 and / or<br>PAD ≥ 110 mg/dl | Blood Pressure Stage 2:<br>PAS 160–179 and/or<br>PAD 100–109 | Blood Pressure Stage 1:<br>PAS 140–159 and/or<br>PAD 90–99 | Border Blood Pressure:<br>PAS 121–139 or PAD<br>81–89 | Normal Blood Pressure:<br>PAS ≥ 120 or PAD ≤ 80 | Critical |

**Nutrition**

|                            |                                         |                                        |                                        |                                                         |                                                                                                                                                                                |              |
|----------------------------|-----------------------------------------|----------------------------------------|----------------------------------------|---------------------------------------------------------|--------------------------------------------------------------------------------------------------------------------------------------------------------------------------------|--------------|
| Energy balance intake      | Intake ≤ or ≥ 1000 Kcal of energy value | Intake ≤ or ≥ 750 Kcal of energy value | Intake ≤ or ≥ 500 Kcal of energy value | Adequate energy intake (VET)                            | Same previous condition, with healthy meals                                                                                                                                    | Non-critical |
| Simple carbohydrate intake | Intake ≥ 16% of VET                     | Intake ≥ 13% of VET                    | Intake ≥ 10% of VET                    | Adequate simple carbohydrate intake (< 10% of VET)      | Eventually consumes simple carbohydrate                                                                                                                                        | Critical     |
| Saturated lipids intake    | Intake ≥ 10% of VET                     | Intake ≥ 8.5% of VET                   | Intake ≥ 7% of VET                     | Adequate saturated lipids intake (< 7% of VET)          | Eventually consumes saturated lipids<br>Does not add salt to the preparations after they are ready, and when consuming processed foods prioritizes those of low sodium content | Critical     |
| Sodium mineral intake      | Consumes more than 5 g of sodium daily  | Uses more than 3.5 g of sodium daily   | Uses more than 2 g of sodium daily     | Adequate mineral sodium daily intake (2 g sodium daily) |                                                                                                                                                                                | Critical     |

|                  |                         |                                                                                                                        |                                                                                                                                          |                                                                                                               |                                                                                                                               |                                                                                                                      |              |
|------------------|-------------------------|------------------------------------------------------------------------------------------------------------------------|------------------------------------------------------------------------------------------------------------------------------------------|---------------------------------------------------------------------------------------------------------------|-------------------------------------------------------------------------------------------------------------------------------|----------------------------------------------------------------------------------------------------------------------|--------------|
|                  | Fibre intake            | Intake less than 22 g/day                                                                                              | Intake less than 23.5 g/day                                                                                                              | Intake less than 25 g/day                                                                                     | Minimum consumption of 25 g/day                                                                                               | Adequate fibre intake, with consumption of soluble and insoluble fibres                                              | Non-critical |
|                  | Alcohol use             | Frequent heavy drinker (drinks 1 time or more per week and consumes 5 or more doses per occasion, once a week or more) | Frequent drinker (drinks once a week or more and may or may not consume 5 or more doses at least once a week, but more than once a year) | Less frequent drinker (drinks 1 to 3 times a month and may or not drink 5 doses or more at least once a year) | Non-frequent drinker (drinks less than once a month, but at least once a year and does not drink 5 or more doses at one time) | Abstemious (drinks less than once a year or has never drunk in life)                                                 | Critical     |
|                  | Level of food knowledge | Unsatisfactory level of knowledge                                                                                      | Bad level of knowledge                                                                                                                   | Regular level of knowledge                                                                                    | Good level of knowledge                                                                                                       | Excellent level of knowledge                                                                                         | Non-critical |
|                  | Body weight condition   | ≥40.0 Severe obesity or BMI <16 (Severe thinness)                                                                      | BMI 30-39.9 Obesity or 16 to <17 (Moderate thinness)                                                                                     | BMI 25-29.9 Overweight or pre-obese or 17 to <18.5 (Slight thinness)                                          | BMI between 18.5–24.9 Normal or eutrophic                                                                                     | Same previous condition with protective factors of healthy eating and regular physical activity for more than 1 year | Non-critical |
|                  | Altered triglycerides   | Very high (≥500 mg/dl)                                                                                                 | High (Between 200 and 499 mg/dl)                                                                                                         | Borderline (Between 150 and 199 mg/dl)                                                                        | <150 mg/dl                                                                                                                    | Less than 150 mg/dl with control of saturated fat and sugars intake in the diet                                      | Critical     |
| <b>Dentistry</b> | Oral hygiene quality    | Bad oral hygiene (oral hygiene index - IHOs > 3.0)                                                                     | Poor oral hygiene (IHOs from 2.1 to 3.0)                                                                                                 | Regular oral hygiene (IHOs from 1.1 to 2)                                                                     | Adequate oral hygiene (IHOs from 0 to 1)                                                                                      | Adequate oral hygiene with bi-annual basic preventive treatment                                                      | Non-critical |

|                       |                                                                                                                                                    |                                                                                                                                                           |                                                                                                                                                 |                                                                                                                                        |                                                                               |              |
|-----------------------|----------------------------------------------------------------------------------------------------------------------------------------------------|-----------------------------------------------------------------------------------------------------------------------------------------------------------|-------------------------------------------------------------------------------------------------------------------------------------------------|----------------------------------------------------------------------------------------------------------------------------------------|-------------------------------------------------------------------------------|--------------|
| Periodontal condition | Community periodontal index (IPC) 3 (periodontal bag of 4–5 mm) or 4 (periodontal bag $\geq$ 6 mm)                                                 | IPC 2 (calculus presence)                                                                                                                                 | IPC 1 (presence of bleeding probing)                                                                                                            | IPC 0 (Healthy gum)                                                                                                                    | Same previous condition with adequate oral hygiene                            | Critical     |
| Bruxism               | Visible wear with dentine exposure with loss greater than 2/3 of the clinical crown, associated with the presence of one more bruxism sign/symptom | Visible wear with dentine exposure with loss greater than 1/3 to 2/3 of the clinical crown, associated with the presence of one more bruxism sign/symptom | Visible wear with exposure of dentin and loss of up to 1/3 of the clinical crown, associated with the presence of one more bruxism sign/symptom | Visible wear restricted to enamel associated or not with the presence of one more bruxism sign/symptom. With use of myorelaxant plaque | Same previous condition with multidisciplinary follow-up                      | Non-critical |
| Periodontal disease   | Untreated periodontitis, with dental mobility, associated with risk factors (smoking and/or chronic non-communicable disease - DCNT)               | Untreated periodontitis, with dental mobility, not associated with risk factors (smoking and/or DCNT)                                                     | Untreated periodontitis, without dental mobility, associated or not with risk factors (smoking and/or DCNT)                                     | Treated periodontitis, associated or not with risk factors                                                                             | Same previous condition associated with the periodic maintenance consultation | Critical     |
| Caries                | Presence of caries in dentin, with extensive coronary destruction, and probable involvement of the pulp                                            | Presence of caries in dentin                                                                                                                              | Presence of active caries, limited to enamel, with or without cavitation                                                                        | Caries, diagnosed in previous periodic examination, treated                                                                            | Same previous condition with adequate oral hygiene                            | Critical     |



Oral lesion on  
soft or hard  
tissues

Soft tissue lesion with  
malignant potential,  
recurrent

Soft tissue lesion with  
malignant potential

Soft tissue lesion  
without potential for  
malignancy

Lesion diagnosed on  
previous examination,  
treated

Lesion  
diagnosed on  
previous  
examination,  
treated, without  
diagnosis of  
malignancy

Critical

---
